# Supplementary material for: Rubus Suavissimus Alleviates High-fat Diet-induced Lipid Metabolism Disorder via Modulation of the PPAR / SREBP Pathway in Syrian Golden Hamsters
Source: Research Square preprint supplement (doi:10.21203/rs.3.rs-126127/v1), 2020-12-16
Supplement: Supplementary file 1 [file dec2554d6180eb67b5192f9f.docx]

# Supplementary materials

**Table S1. Primer sequences**

| **No.** | **Primer name** | **Primer sequences (5'to3')** | **Annealing temperature (℃)** |
| --- | --- | --- | --- |
| **1** | aP2-F | CCATCCGAACAGAGAGCACAT | 57 |
| **2** | aP2-R | ATCTTGTCACCCTCACGCTTC | 57 |
| **3** | C/EBPα-F | ACTCGGTGCGTCTGAGATG | 57 |
| **4** | C/EBPα-R | GGCTTCCTGAATCTTCCTCCT | 57 |
| **5** | LPL-F | CTGGACGGTGACAGGAATGTA | 57 |
| **6** | LPL-R | CTCCAAGGCTGTACCCCAAG | 57 |
| **7** | Glut 4-F | GGCAGTGGCGATAGACAGAT | 57 |
| **8** | Glut 4-R | GTGGCATTAGCAAGGTTGAGAA | 57 |
| **9** | PPARγ-F | CACAGTTGACTTCTCCAGCATT | 57 |
| **10** | PPARγ-R | CCACAGACTCGGCACTCAA | 57 |
| **11** | SREBP1-F | CGCTACCGTTCCTCTATCAATG | 50 |
| **12** | SREBP1-R | TGCTACCTCTGCTGCCAAG | 50 |
| **13** | ACC1-F | GCAACCACATCTTCCTCAACTT | 50 |
| **14** | ACC1-R | TCCACAGCCGACTTCCATAG | 50 |
| **15** | PPARα-F | CATCACAGGAAGCCAGAACAC | 50 |
| **16** | PPARα-R | TATCACAGAGGAAGCCAGAGAC | 50 |
| **17** | FAS-F | CAGTGCTCCGAGGTCATTCC | 50 |
| **18** | FAS-R | AAGAGTGCCGTGCCGTAGA | 50 |
| **19** | SCD1-F | TGGGTTGGCTGCTTGTG | 56 |
| **20** | SCD1-R | GCGTGGGCAGGATGAAG | 56 |
| **21** | β-actin-F | TCTACAATGAGCTGCGTGTG | 57 |
| **22** | β-actin-R | GGTCAGGATCTTCATGAGGT | 57 |
